# Supplementary material for: Respiratory disease in rhesus macaques inoculated with SARS-CoV-2
Source: Springer Nature journal article supplement (doi:10.1038/s41586-020-2324-7), 2020-05-12
Supplement: 41586_2020_2324_MOESM1_ESM.pdf [file 41586_2020_2324_MOESM1_ESM.pdf]

---

**Supplementary information**

---

**Respiratory disease in rhesus macaques inoculated with SARS-CoV-2**

---

In the format provided by the authors and unedited

Vincent J. Munster, Friederike Feldmann, Brandi N. Williamson, Neeltje van Doremalen, Lizzette Pérez-Pérez, Jonathan Schulz, Kimberly Meade-White, Atsushi Okumura, Julie Callison, Beniah Brumbaugh, Victoria A. Avanzato, Rebecca Rosenke, Patrick W. Hanley, Greg Saturday, Dana Scott, Elizabeth R. Fischer & Emmie de Wit<sup>✉</sup>

## Supplemental Information

### Respiratory disease in rhesus macaques inoculated with SARS-CoV-2

<sup>1</sup>Vincent J. Munster, <sup>2</sup>Friederike Feldmann, <sup>1</sup>Brandi N. Williamson, <sup>1</sup>Neeltje van Doremalen,  
<sup>1</sup>Lizzette Pérez-Pérez, <sup>1</sup>Jonathan Schulz, <sup>1</sup>Kimberly Meade-White, <sup>1</sup>Atsushi Okumura, <sup>1</sup>Julie  
Callison, <sup>3</sup>Beniah Brumbaugh, <sup>1</sup>Victoria Avanzato, <sup>2</sup>Rebecca Rosenke, <sup>2</sup>Patrick W. Hanley, <sup>2</sup>Greg  
Saturday, <sup>2</sup>Dana Scott, <sup>3</sup>Elizabeth R. Fischer, <sup>1</sup>Emmie de Wit

*<sup>1</sup>Laboratory of Virology, <sup>2</sup>Rocky Mountain Veterinary Branch and <sup>3</sup>Research Technologies  
Branch, National Institute of Allergy and Infectious Diseases, National Institutes of Health,  
Hamilton, MT, United States of America*

**Table S1. Clinical scoring sheet used for health assessments of nonhuman primates. Of note, a combined score of 35 indicates humane endpoint and requires immediate euthanasia.**

|                                |                                                                                                                                        |                                                                      |       |       |       |
|--------------------------------|----------------------------------------------------------------------------------------------------------------------------------------|----------------------------------------------------------------------|-------|-------|-------|
| Animal Tattoo:                 |                                                                                                                                        | Study ID:                                                            |       |       |       |
| Species:                       | Room:                                                                                                                                  | Date:                                                                |       |       |       |
|                                |                                                                                                                                        | Time                                                                 |       |       |       |
|                                | <b>Clinical Signs</b>                                                                                                                  | Tech:                                                                |       |       |       |
|                                |                                                                                                                                        |                                                                      | Score | Score | Score |
| <b>General Appearance</b>      | Normal, Alert                                                                                                                          | 0                                                                    |       |       |       |
|                                | a)Abnormal or Hunched Posture, b)Dull Appearance to Eyes                                                                               | 5                                                                    |       |       |       |
|                                | a)Dehydration b)Notable Weight Loss c)Obvious Swelling d) Tissue mass                                                                  | 10                                                                   |       |       |       |
|                                | Bleeding from any orifice (not related to routine procedures or menstruation)                                                          | 15                                                                   |       |       |       |
| <b>Skin and Haircoat</b>       | Normal                                                                                                                                 | 0                                                                    |       |       |       |
|                                | a)Ruffled Fur, b)Unkept Appearance                                                                                                     | 5                                                                    |       |       |       |
|                                | a)Rash, b)Pallor, c)Redness, d)Icterus, e)Petechiae, f)Ecchymoses, g) Wound, h)Abscess, i)Ulcer                                        | 10                                                                   |       |       |       |
| <b>Nose, Mouth, Eyes, Head</b> | Normal                                                                                                                                 | 0                                                                    |       |       |       |
|                                | a)Nasal discharge, b)Excessive Salivation, c)Ocular Discharge, d)Lacrimation, e)Reddened Eyes, f)Ptosis                                | 5                                                                    |       |       |       |
| <b>Resp</b>                    | Normal                                                                                                                                 | 0                                                                    |       |       |       |
|                                | a)Increased or b)Decreased Respiration, c)cough, d)sneezing                                                                            | 5                                                                    |       |       |       |
|                                | a)Dyspnea, b)Open Mouth Breathing, c)Cyanosis                                                                                          | 15                                                                   |       |       |       |
| <b>Stool</b>                   | NS – Normal<br>SNS- Soft normal<br>PS- Pasty Stool                                                                                     | WPS- Wet Pasty<br>TLS – Thick liquid<br>LS – Liquid<br>DS – Dry Hard |       |       |       |
| <b>Feces &amp; Urine</b>       | Normal                                                                                                                                 | 0                                                                    |       |       |       |
|                                | a)Decreased Feces, b)Dry, Wet and Pasty, c)Watery Feces, d)Discoloration e)Decreased urine, f)Discoloration                            | 2                                                                    |       |       |       |
|                                | Feces absent                                                                                                                           | 5                                                                    |       |       |       |
|                                | a)Liquid Feces (if debilitating), b)Urine Absent, c)Blood in Feces or Urine                                                            | 10                                                                   |       |       |       |
| <b>Appetite</b>                | Normal (eating more than half the biscuits)                                                                                            | 0                                                                    |       |       |       |
|                                | Decreased (eating less than half the biscuits)                                                                                         | 3                                                                    |       |       |       |
|                                | Eating Fruit but no biscuits                                                                                                           | 5                                                                    |       |       |       |
|                                | Severely decreased (not eating biscuits or fruit)                                                                                      | 10                                                                   |       |       |       |
| <b>Activity</b>                | Normal                                                                                                                                 | 0                                                                    |       |       |       |
|                                | a) Hyperactivity (circling, increased aggression), b)Hypoactivity (hunched, inactive on camera, active with people in room)            | 5                                                                    |       |       |       |
|                                | a)Ataxia, b)Neurological Signs (tremors, head tilt, ), c)Loss of Interest in Treats                                                    | 10                                                                   |       |       |       |
|                                | a)Reluctant to Move, b)Uses Cage for Support, c)Difficulty Getting to Food or Water (decreased response to human presence), d)Seizures | 15                                                                   |       |       |       |
|                                | a)Down with no or Minimal Response to Human Approach, b)Coma                                                                           | 35                                                                   |       |       |       |
| <b>Food eaten</b>              |                                                                                                                                        |                                                                      |       |       |       |

|             |  |  |  |  |  |
|-------------|--|--|--|--|--|
| Water Given |  |  |  |  |  |
| TOTAL SCORE |  |  |  |  |  |

**Table S2. Blood chemistry in rhesus macaques infected with SARS-CoV-2.** Blood samples were analyzed using the General Chemistry 13 panel in a Piccolo Express chemistry analyzer.

| Animal | Time (dpi) | Glucose (mg/dL) | BUN (mg/dL) | Creatinine (mg/dL) | Calcium (mg/dL) | Albumin (g/dL) | Total protein (g/dL) | Calc Glob (g/dL) | ALT (U/L) | AST (U/L) | AST/ALT Ratio | ALP (U/L) | Total bilirubin (mg/dL) | GGT (U/L) | Amylase (U/L) | Hem | Lip | Ict |
|--------|------------|-----------------|-------------|--------------------|-----------------|----------------|----------------------|------------------|-----------|-----------|---------------|-----------|-------------------------|-----------|---------------|-----|-----|-----|
| RM1    | 0          | 118             | 15          | 1.1                | 9.5             | 3.2            | 6.6                  | 3.4              | 46        | 47        | 1.02          | 516       | 0.6                     | 102       | 442           | 0   | 0   | 0   |
|        | 1          | 124             | 14          | 1.1                | 9.1             | 3.1            | 6.2                  | 3.1              | 83        | 66        | 0.80          | 463       | 0.7                     | 89        | 591           | 1   | 0   | 0   |
|        | 3          | 93              | 20          | 1.1                | 8.6             | 3.0            | 6.1                  | 3.1              | 78        | 57        | 0.73          | 411       | 0.7                     | 81        | 464           | 0   | 0   | 0   |
| RM2    | 0          | 97              | 11          | 0.6                | 10.5            | 3.4            | 7.5                  | 4.1              | 31        | 29        | 0.94          | 161       | 0.6                     | 53        | 325           | 0   | 0   | 0   |
|        | 1          | 132             | 10          | 0.8                | 10.6            | 3.3            | 7.5                  | 4.2              | 29        | 29        | 1.00          | 161       | 0.5                     | 50        | 373           | 2   | 0   | 0   |
|        | 3          | 85              | 8           | 0.7                | 10.0            | 3.3            | 7.4                  | 4.1              | 25        | 33        | 1.32          | 172       | 0.7                     | 49        | 377           | 1   | 0   | 0   |
| RM3    | 0          | 54              | 22          | 0.9                | 10.1            | 3.5            | 6.7                  | 3.2              | 36        | 44        | 1.22          | 767       | 0.6                     | 127       | 330           | 0   | 0   | 0   |
|        | 1          | 104             | 21          | 0.9                | 9.6             | 3.5            | 6.5                  | 3.0              | 46        | 66        | 1.43          | 701       | 0.8                     | 117       | 539           | 0   | 0   | 0   |
|        | 3          | 82              | 20          | 1.1                | 9.4             | 3.5            | 6.6                  | 3.1              | 44        | 41        | 0.93          | 537       | 0.7                     | 106       | 324           | 0   | 0   | 0   |
| RM4    | 0          | 84              | 19          | 0.9                | 10.1            | 3.5            | 7.2                  | 3.7              | 70        | 49        | 0.70          | 184       | 0.5                     | 75        | 288           | 0   | 0   | 0   |
|        | 1          | 85              | 15          | 0.6                | 9.8             | 3.2            | 6.5                  | 3.3              | 76        | 67        | 0.88          | 166       | 0.5                     | 65        | 251           | 0   | 1   | 0   |
|        | 3          | 66              | 19          | 0.9                | 8.7             | 3.3            | 6.5                  | 3.2              | 58        | 39        | 0.67          | 158       | 0.5                     | 60        | 249           | 0   | 0   | 0   |
| RM5    | 0          | 77              | 12          | 0.8                | 9.8             | 3.3            | 6.6                  | 3.3              | 37        | 38        | 1.03          | 546       | 0.5                     | 98        | 345           | 0   | 0   | 0   |
|        | 1          | 103             | 14          | 0.9                | 10.6            | 3.5            | 7.7                  | 4.2              | 56        | 52        | 0.93          | 598       | 0.6                     | 106       | 385           | 1   | 0   | 0   |
|        | 3          | 78              | 15          | 1.0                | 9.3             | 3.1            | 6.9                  | 3.8              | 40        | 48        | 1.20          | 457       | 0.6                     | 87        | 317           | 0   | 0   | 0   |
|        | 5          | 85              | 14          | 0.9                | 10.3            | 3.4            | 7.8                  | 4.4              | 80        | 62        | 0.78          | 459       | 0.6                     | 95        | 327           | 0   | 0   | 0   |
|        | 7          | 75              | 15          | 0.7                | 9.5             | 3.1            | 6.7                  | 3.6              | 55        | 39        | 0.71          | 415       | 0.6                     | 84        | 341           | 0   | 0   | 0   |
|        | 10         | 75              | 18          | 0.8                | 9.7             | 3.1            | 7.0                  | 3.9              | 42        | 35        | 0.83          | 461       | 0.5                     | 84        | 352           | 0   | 0   | 0   |
|        | 12         | 85              | 13          | 0.9                | 9.6             | 3.2            | 7.3                  | 4.1              | 48        | 38        | 0.79          | 505       | 0.6                     | 87        | 370           | 0   | 0   | 0   |
|        | 14         | 79              | 15          | 0.8                | 9.5             | 3.1            | 6.7                  | 3.6              | 51        | 35        | 0.69          | 446       | 0.5                     | 80        | 408           | 0   | 0   | 0   |
|        | 17         | 82              | 16          | 0.9                | 10.0            | 3.3            | 6.8                  | 3.5              | 83        | 45        | 0.54          | 464       | 0.5                     | 84        | 383           | 0   | 0   | 0   |
| 21     | 73         | 8               | 0.8         | 9.2                | 3.2             | 6.3            | 3.1                  | 60               | 50        | 0.83      | 450           | 0.4       | 81                      | 333       | 0             | 0   | 0   |     |
| RM6    | 0          | 81              | 15          | 0.7                | 9.6             | 3.3            | 5.9                  | 2.6              | 28        | 29        | 1.04          | 361       | 0.5                     | 79        | 354           | 0   | 0   | 0   |
|        | 1          | 118             | 18          | 1.0                | 11.8            | 4.6            | 8.4                  | 3.8              | 41        | 45        | 1.10          | 442       | 0.6                     | 101       | 698           | 0   | 0   | 0   |
|        | 3          | 81              | 12          | 0.7                | 9.8             | 3.5            | 6.8                  | 3.3              | 35        | 32        | 0.91          | 302       | 0.5                     | 80        | 383           | 0   | 0   | 0   |
|        | 5          | 86              | 15          | 0.8                | 11.0            | 3.9            | 8.0                  | 4.1              | 42        | 35        | 0.83          | 331       | 0.5                     | 94        | 382           | 0   | 0   | 0   |
|        | 7          | 68              | 15          | 0.8                | 10.3            | 3.7            | 7.1                  | 3.4              | 42        | 32        | 0.76          | 313       | 0.5                     | 86        | 330           | 0   | 0   | 0   |
|        | 10         | 72              | 16          | 0.7                | 10.2            | 3.7            | 7.2                  | 3.5              | 50        | 29        | 0.58          | 320       | 0.5                     | 90        | 399           | 0   | 0   | 0   |
|        | 12         | 76              | 13          | 0.7                | 10.4            | 3.7            | 7.2                  | 3.5              | 44        | 28        | 0.64          | 326       | 0.5                     | 90        | 382           | 0   | 0   | 0   |
|        | 14         | 72              | 14          | 0.7                | 10.5            | 3.8            | 7.3                  | 3.5              | 41        | 30        | 0.73          | 323       | 0.5                     | 90        | 411           | 0   | 0   | 0   |
|        | 17         | 74              | 17          | 0.7                | 10.7            | 3.8            | 7.5                  | 3.7              | 37        | 31        | 0.84          | 305       | 0.5                     | 87        | 389           | 0   | 0   | 0   |
| 21     | 68         | 13              | 0.7         | 10.3               | 3.7             | 7.0            | 3.3                  | 49               | 38        | 0.78      | 316           | 0.4       | 84                      | 353       | 0             | 0   | 0   |     |
| RM7    | 0          | 98              | 11          | 0.9                | 10.1            | 3.8            | 7.3                  | 3.5              | 45        | 33        | 0.73          | 770       | 0.5                     | 136       | 417           | 0   | 0   | 0   |
|        | 1          | 143             | 14          | 1.0                | 10.9            | 4.0            | 7.9                  | 3.9              | 60        | 58        | 0.97          | 716       | 0.6                     | 135       | 342           | 0   | 0   | 0   |
|        | 3          | 90              | 13          | 0.8                | 9.2             | 3.3            | 6.6                  | 3.3              | 44        | 37        | 0.84          | 468       | 0.5                     | 103       | 384           | 0   | 0   | 0   |
|        | 5          | 102             | 17          | 0.9                | 11.4            | 3.9            | 8.2                  | 4.3              | 46        | 37        | 0.80          | 501       | 0.5                     | 118       | 489           | 0   | 0   | 0   |
|        | 7          | 69              | 13          | 0.8                | 9.4             | 3.3            | 6.9                  | 3.6              | 42        | 29        | 0.69          | 424       | 0.5                     | 95        | 421           | 0   | 0   | 0   |
|        | 10         | 75              | 17          | 0.7                | 10.0            | 3.5            | 7.1                  | 3.6              | 43        | 28        | 0.65          | 478       | 0.5                     | 99        | 448           | 0   | 0   | 0   |

|            |           |     |    |     |      |     |     |     |    |    |      |     |     |     |     |   |   |   |
|------------|-----------|-----|----|-----|------|-----|-----|-----|----|----|------|-----|-----|-----|-----|---|---|---|
|            | <b>12</b> | 83  | 14 | 1.0 | 10.7 | 4.0 | 8.1 | 4.1 | 46 | 38 | 0.83 | 604 | 0.5 | 116 | 457 | 0 | 0 | 0 |
|            | <b>14</b> | 72  | 12 | 0.8 | 9.8  | 3.4 | 6.9 | 3.5 | 84 | 33 | 0.39 | 540 | 0.5 | 100 | 481 | 0 | 0 | 0 |
|            | <b>17</b> | 77  | 17 | 1.0 | 10.1 | 3.5 | 6.9 | 3.4 | 60 | 53 | 0.88 | 513 | 0.5 | 99  | 441 | 0 | 0 | 0 |
|            | <b>21</b> | 67  | 9  | 0.7 | 9.7  | 3.5 | 6.7 | 3.2 | 46 | 41 | 0.89 | 569 | 0.4 | 105 | 416 | 0 | 0 | 0 |
| <b>RM8</b> | <b>0</b>  | 110 | 14 | 0.8 | 11.2 | 3.6 | 7.6 | 4.0 | 26 | 31 | 1.19 | 260 | 0.5 | 79  | 444 | 0 | 0 | 0 |
|            | <b>1</b>  | 110 | 11 | 0.8 | 11.0 | 3.6 | 7.4 | 3.8 | 46 | 57 | 1.24 | 259 | 0.6 | 75  | 493 | 0 | 0 | 0 |
|            | <b>3</b>  | 76  | 12 | 0.7 | 8.9  | 3.2 | 6.7 | 3.5 | 58 | 49 | 0.84 | 197 | 0.6 | 64  | 438 | 0 | 0 | 0 |
|            | <b>5</b>  | 83  | 13 | 0.7 | 11.1 | 3.7 | 7.8 | 4.1 | 68 | 36 | 0.53 | 202 | 0.5 | 73  | 467 | 1 | 0 | 0 |
|            | <b>7</b>  | 75  | 13 | 0.7 | 9.6  | 3.3 | 6.7 | 3.4 | 48 | 31 | 0.65 | 182 | 0.5 | 62  | 398 | 0 | 0 | 0 |
|            | <b>10</b> | 76  | 14 | 0.6 | 10.1 | 3.5 | 6.7 | 3.2 | 38 | 29 | 0.76 | 193 | 0.5 | 61  | 383 | 2 | 0 | 0 |
|            | <b>12</b> | 76  | 11 | 0.7 | 9.2  | 3.4 | 6.7 | 3.3 | 34 | 27 | 0.79 | 211 | 0.5 | 61  | 359 | 0 | 0 | 0 |
|            | <b>14</b> | 70  | 11 | 0.7 | 9.7  | 3.5 | 6.7 | 3.2 | 34 | 28 | 0.82 | 229 | 0.5 | 65  | 447 | 0 | 0 | 0 |
|            | <b>17</b> | 77  | 12 | 0.7 | 10.1 | 3.4 | 6.8 | 3.4 | 34 | 36 | 1.06 | 206 | 0.5 | 62  | 436 | 0 | 0 | 0 |
|            | <b>21</b> | 74  | 11 | 0.7 | 9.9  | 3.6 | 6.6 | 3.0 | 35 | 27 | 0.77 | 207 | 0.5 | 62  | 367 | 0 | 0 | 0 |
